# Supplementary material for: PD-L1 on Tumor Cells Is Induced in Ascites and Promotes Peritoneal Dissemination of Ovarian Cancer through CTL Dysfunction
Source: Oxford University Press journal article supplement (doi:10.1158/1078-0432.ccr-12-2199), 2013-01-23
Supplement: 10780432ccr122199-sup-tab1.xlsx [file 10780432ccr122199-sup-tab1.xlsx]

## Sheet: Sheet1
KOV-IH-65				KOV-MA-64
Age (y)	median	55		Age (y)	median	53
	range	26-76			range	28-81
		Number				Number
FIGO stage	Ia	11		FIGO stage	Ia	9
	Ic	13			Ic	14
	II c	3			II a	2
	IIIa	2			II c	5
	IIIb	1			IIIb	6
	IIIc	23			IIIc	22
	IV	12			IV	6
Histological subtype	Serous	26		Histological subtype	Serous	29
	Endometrioid	10			Endometrioid	13
	Mucinous	2			Mucinous	2
	Clear	21			Clear	16
	Mixed	0			Mixed	1
	Others	6			Others	3
Ascites cytology	positive	44		Ascites cytology	positive	31
	negative	22			negative	33
Total		65		Total		64
10 common patients are included in KOV-IH-65 and KOV-MA-64.
