# Supplementary material for: PD-L1 on Tumor Cells Is Induced in Ascites and Promotes Peritoneal Dissemination of Ovarian Cancer through CTL Dysfunction
Source: Oxford University Press journal article supplement (doi:10.1158/1078-0432.ccr-12-2199), 2013-01-23
Supplement: 10780432ccr122199-sup-tab2.xlsx [file 10780432ccr122199-sup-tab2.xlsx]

## Sheet: Sheet1
GOID	Term	p-value
GO:0005730	nucleolus	9.07e-07
GO:0032736	positive regulation of interleukin-13 production	9.07e-07
GO:0032754	positive regulation of interleukin-5 production	9.07e-07
GO:0034660	ncRNA metabolic process	1.18e-06
GO:0032674	regulation of interleukin-5 production	2.79e-06
GO:0032753	positive regulation of interleukin-4 production	4.34e-06
GO:0004812	aminoacyl-tRNA ligase activity	4.34e-06
GO:0016875	ligase activity, forming carbon-oxygen bonds	4.34e-06
GO:0016876	ligase activity, forming aminoacyl-tRNA and related compounds	4.34e-06
GO:0006418	tRNA aminoacylation for protein translation	4.34e-06
GO:0043038	amino acid activation	4.34e-06
GO:0043039	tRNA aminoacylation	4.34e-06
GO:0032656	regulation of interleukin-13 production	5.01e-06
GO:0001972	retinoic acid binding	1.08e-05
GO:0045630	positive regulation of T-helper 2 cell differentiation	1.34e-05
GO:0045628	regulation of T-helper 2 cell differentiation	1.47e-05
GO:0002828	regulation of type 2 immune response	2.21e-05
GO:0003708	retinoic acid receptor activity	2.87e-05
GO:0048384	retinoic acid receptor signaling pathway	2.91e-05
GO:0032526	response to retinoic acid	5.8e-05
GO:0006139	nucleobase-containing compound metabolic process	8.48e-05
GO:0090304	nucleic acid metabolic process	0.000105
GO:0032183	SUMO binding	0.000252
GO:0032649	regulation of interferon-gamma production	0.000252
GO:0032720	negative regulation of tumor necrosis factor production	0.000252
GO:0032938	negative regulation of translation in response to oxidative stress	0.000252
GO:0043556	regulation of translation in response to oxidative stress	0.000252
GO:0045624	positive regulation of T-helper cell differentiation	0.000294
GO:0045622	regulation of T-helper cell differentiation	0.000309
GO:0043233	organelle lumen	0.000356
GO:0032689	negative regulation of interferon-gamma production	0.000368
GO:0003823	antigen binding	0.000397
GO:0030520	intracellular estrogen receptor signaling pathway	0.000397
GO:0070013	intracellular organelle lumen	0.000407
GO:0033189	response to vitamin A	0.000407
GO:0034641	cellular nitrogen compound metabolic process	0.000417
GO:0031981	nuclear lumen	0.000417
GO:0032673	regulation of interleukin-4 production	0.000417
GO:0031974	membrane-enclosed lumen	0.000439
GO:0005501	retinoid binding	0.000475
GO:0005634	nucleus	0.000625
GO:0032055	negative regulation of translation in response to stress	0.000634
GO:0005515	protein binding	0.000641
GO:0045343	regulation of MHC class I biosynthetic process	0.000657
GO:0006807	nitrogen compound metabolic process	0.000676
GO:0030575	nuclear body organization	0.00101
GO:0030578	PML body organization	0.00101
GO:0017148	negative regulation of translation	0.00102
GO:0002682	regulation of immune system process	0.00134
GO:0016072	rRNA metabolic process	0.00134
GO:0043370	regulation of CD4-positive, alpha-beta T cell differentiation	0.00134
GO:2000514	regulation of CD4-positive, alpha-beta T cell activation	0.00134
GO:0006399	tRNA metabolic process	0.00146
GO:0043372	positive regulation of CD4-positive, alpha-beta T cell differentiation	0.00167
GO:2000516	positive regulation of CD4-positive, alpha-beta T cell activation	0.00167
GO:0002684	positive regulation of immune system process	0.00184
GO:0050897	cobalt ion binding	0.00211
GO:0019840	isoprenoid binding	0.00231
GO:0006364	rRNA processing	0.00243
GO:0043555	regulation of translation in response to stress	0.00282
GO:0043183	vascular endothelial growth factor receptor 1 binding	0.00287
GO:0005367	myo-inositol:sodium symporter activity	0.00287
GO:0044428	nuclear part	0.00293
GO:0033554	cellular response to stress	0.00398
GO:0050896	response to stimulus	0.00457
GO:0005488	binding	0.00611
GO:0002376	immune system process	0.00624
GO:0007182	common-partner SMAD protein phosphorylation	0.00624
GO:0034470	ncRNA processing	0.00649
GO:0046325	negative regulation of glucose import	0.00677
GO:0006955	immune response	0.007
GO:0003950	NAD+ ADP-ribosyltransferase activity	0.007
GO:0043117	positive regulation of vascular permeability	0.00716
GO:0005549	odorant binding	0.00716
GO:0000049	tRNA binding	0.00775
GO:0060216	definitive hemopoiesis	0.00775
GO:0003676	nucleic acid binding	0.00786
GO:0044419	interspecies interaction between organisms	0.00794
GO:0006977	DNA damage response, signal transduction by p53 class mediator resulting in cell cycle arrest	0.00852
GO:0072395	signal transduction involved in cell cycle checkpoint	0.00852
GO:0072401	signal transduction involved in DNA integrity checkpoint	0.00852
GO:0072404	signal transduction involved in G1/S transition checkpoint	0.00852
GO:0072413	signal transduction involved in mitotic cell cycle checkpoint	0.00852
GO:0072422	signal transduction involved in DNA damage checkpoint	0.00852
GO:0072431	signal transduction involved in mitotic cell cycle G1/S transition DNA damage checkpoint	0.00852
GO:0072474	signal transduction involved in mitotic cell cycle G1/S checkpoint	0.00852
GO:0033273	response to vitamin	0.00852
GO:0010829	negative regulation of glucose transport	0.0109
GO:0030852	regulation of granulocyte differentiation	0.0122
GO:0060753	regulation of mast cell chemotaxis	0.013
GO:0060754	positive regulation of mast cell chemotaxis	0.013
GO:0071453	cellular response to oxygen levels	0.013
GO:0071456	cellular response to hypoxia	0.013
GO:0043490	malate-aspartate shuttle	0.013
GO:0071158	positive regulation of cell cycle arrest	0.0159
GO:0046637	regulation of alpha-beta T cell differentiation	0.0172
GO:0002230	positive regulation of defense response to virus by host	0.018
GO:0032680	regulation of tumor necrosis factor production	0.019
GO:0042254	ribosome biogenesis	0.0191
GO:0010212	response to ionizing radiation	0.0211
GO:0003723	RNA binding	0.0231
GO:0046638	positive regulation of alpha-beta T cell differentiation	0.0231
GO:0045719	negative regulation of glycogen biosynthetic process	0.0231
GO:0000124	SAGA complex	0.0231
GO:0005100	Rho GTPase activator activity	0.0278
GO:0050840	extracellular matrix binding	0.0288
GO:0003684	damaged DNA binding	0.0292
GO:0006974	response to DNA damage stimulus	0.032
GO:0046982	protein heterodimerization activity	0.0346
GO:0050776	regulation of immune response	0.0349
GO:0009264	deoxyribonucleotide catabolic process	0.0349
GO:0050821	protein stabilization	0.0359
GO:0007184	SMAD protein import into nucleus	0.0376
GO:0031065	positive regulation of histone deacetylation	0.0424
GO:0048739	cardiac muscle fiber development	0.0424
GO:0001818	negative regulation of cytokine production	0.0437
GO:0002699	positive regulation of immune effector process	0.0451
