# Supplementary material for: PD-L1 on Tumor Cells Is Induced in Ascites and Promotes Peritoneal Dissemination of Ovarian Cancer through CTL Dysfunction
Source: Oxford University Press journal article supplement (doi:10.1158/1078-0432.ccr-12-2199), 2013-01-23
Supplement: 10780432ccr122199-sup-tab4.xlsx [file 10780432ccr122199-sup-tab4.xlsx]

## Sheet: Sheet1
	CTL_PDL1_UP genes	CTL_PDL1_DN genes
FDR q-value	0.0376	0.0884
FWER p-value	0.015	0.04
